# Supplementary material for: (Na0.5Bi0.5)0.7Sr0.3TiO3 modified by Bi(Mg2/3Nb1/3)O3 ceramics with high energy-storage properties and an ultrafast discharge rate
Source: Royal Society of Chemistry journal article supplement (doi:10.1039/c9tc06218a), 2019-12-12
Supplement: c9tc06218a1.pdf [file c9tc06218a1.pdf]

## Supporting Information

### **(Na<sub>0.5</sub>Bi<sub>0.5</sub>)<sub>0.7</sub>Sr<sub>0.3</sub>TiO<sub>3</sub> Modified by Bi(Mg<sub>2/3</sub>Nb<sub>1/3</sub>)O<sub>3</sub> Ceramics with High Energy-Storage Properties and Ultrafast Discharge Rate**

**Ying Lin,<sup>\*a</sup> Da Li,<sup>a</sup> Miao Zhang<sup>a</sup> and Haibo Yang<sup>\*a</sup>**

<sup>a</sup> School of Materials Science and Engineering, Shaanxi Key Laboratory of Green Preparation and Functionalization for Inorganic Materials, Shaanxi University of Science and Technology, Xi'an 710021, China

\* Corresponding Authors

(Ying Lin\*) Email: [linyong\\_333@163.com](mailto:linyong_333@163.com)

(Haibo Yang\*) Email: [yanghaibo@sust.edu.cn](mailto:yanghaibo@sust.edu.cn)

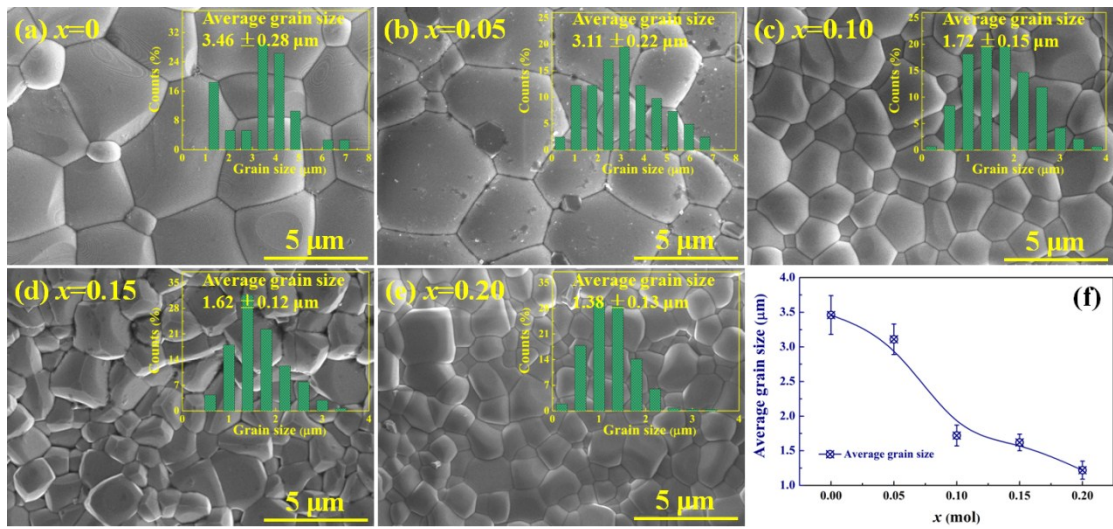

Figure S1. SEM of the natural surface for the (1-x)NBST-xBMN ceramics: (a)  $x=0$ , (b)  $x=0.05$ , (c)  $x=0.10$ , (d)  $x=0.15$ , (e)  $x=0.20$ . (f) Average grain sizes of the (1-x)NBST-xBMN ceramics.

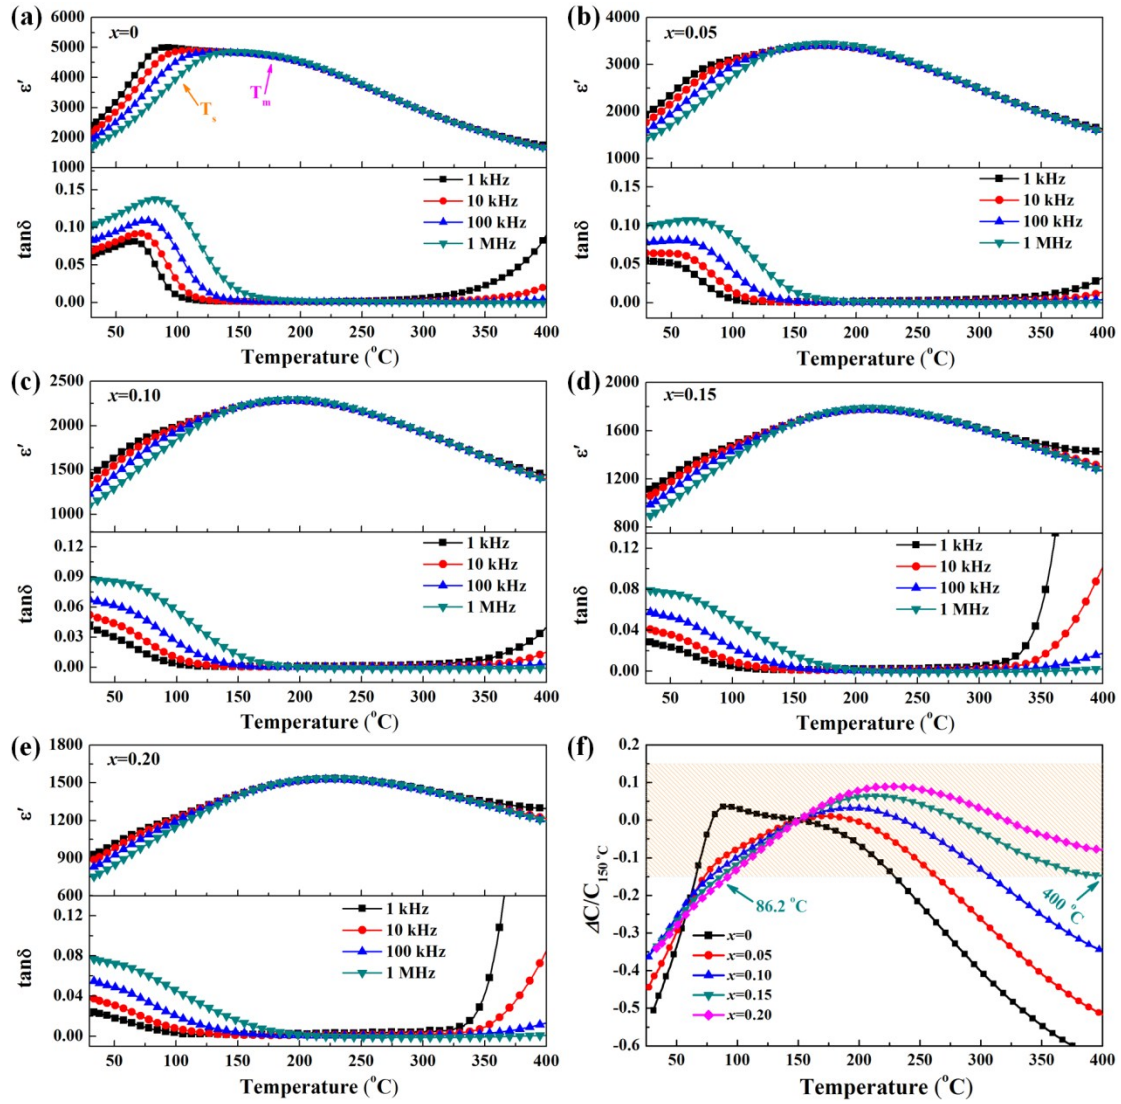

Figure S2. Temperature dependence of  $\tan \delta$  and  $\epsilon'$  of the  $(1-x)\text{NBST}-x\text{BMN}$  ceramics measured from 1 kHz to 1 MHz: (a)  $x=0$ , (b)  $x=0.05$ , (c)  $x=0.10$ , (d)  $x=0.15$  and (e)  $x=0.20$ . (f) TCC of the  $(1-x)\text{NBST}-x\text{BMN}$  ceramics at a frequency of 1 kHz and a base temperature of 150 °C.
